# Supplementary material for: A novel inwardly rectifying K+ channel, Kir2.5, is upregulated under chronic cold stress in fish cardiac myocytes
Source: Oxford University Press journal article supplement (doi:10.1242/jeb.016121), 2008-06-14
Supplement: jeb016121-sup-016121-figs1.pdf [file jeb016121-sup-016121-figs1.pdf]

**A**

ATCAGCAAAGCAGATGAGAACCGAGTATCCTTCCATCCTTGCCCTTCTGTCAATCAA -168  
 GGTCCAACCTGAGCAAAGAGACGCTCCTCGTCCGGCTCTGAACAGACCCATTTTCCTTC -108  
 TTGTGTGGTCCCGCTGAGTGTTCAAAACCTGTTTCCAAACGCTTTTCCGAAACTAA -48  
 M G S V R S  
 GACTGTTTTCCAAAGCAGAAAAGCAGACCTCCAGGCTGAGGTGatgggaagtgtgc 13  
 A N R Y S I V S S E E D G M K L A T A A 25  
 gggccaaccgctacagcatcgtgcatcagagagagcggatgaagttggccaactgctg 73  
 V P N G Y G N G K G K V H T R H Q I Q S 45  
 cgggtccaaatgggtacggttaacgggaagggttaagtcacacccgtcaccagatccaga 133  
 R F V K K D G H C N V Q F I N V S E K S 65  
 gcaggtttgtcaagaagtggacactgcaatgctgacgttcatcaacgtcagtgagaaga 193  
 Q R Y L A D I F T T C V D I R W R M M F 85  
 gccagcgtacctggccgacatcttcaaccagtgctggacatcgtggtggatggatgt 253  
 V I F C L A F L L S W L F F G C I F W L 105  
 tcggtatctctcgtcttggccctcctcgtgctcagtgctgtttttggatgcactctcgtgc 313  
 V A I F H G D L E N D G P K C V S N V S 125  
 tggttgcaatattccatggagacctggagaacgagggccaagtgtgtctccaactgca 373  
 T F T A A F L F S I E T Q T T I G Y G Y 145  
 gcaccttcacggctgcttctctcctcgtatgagacacagaccactattgctacggtt 433  
 R Y V T D E C P I A V F M V V F Q S I V 165  
 atcgctatgttacagatgagtgccccattgctggttcatggttatttcagagcatag 493  
 G C I I D A F I I G A V M A K M A K F K 185  
 ttggctgcatcattgatgctcattatcgtgctgctcatgctcaagatggcaaaccca 353  
 \* \*  
 K R N E T L V F S H N A T V A M R D N K 205  
 agaagcggaaacgagactcgtggtttcagcccaactgctacagtgcccatgagggacaata 613  
 L C L M W R V G N L R K S H L V E A H V 225  
 agctgtgtctcattgtggcgggtggcgaacttgcgcaaaagccactagttagagcccatg 673  
 \* \*  
 R A Q L L R S R T T A E G E F I P L D Q 245  
 ttcgagctcagctccttagatctcgaccacagctgaaggagagtttatccctctagacc 733  
 M D I D V G F D S G I D R I F L V S P I 265  
 agatggacatcagctgggcttgcagctggtattgaccgcatcttctggtgcaccga 793  
 T I V H E I D E D S P F Y D M S K Q E M 285  
 tcaccatcgtccatgagatagatgagacagcccttctacgacatgagcaaacagaaa 853  
 E N S D F E I V V I L E G M V E A T A M 305  
 tggagaactcgtgaacttgaatcgtgttatcctggaggcatggtagagggccacagcca 913  
 T T Q C R S S Y V A S E I L W G H R F E 325  
 tgaccaccaatgccgagctcctacgtggccagtgagatcctgtggggacaccgatttg 973  
 P V L F E E K N Y Y K V D Y S R F H K T 345  
 agcctgtcctctcggagagaaaaactattacaagttagactactctcgtcttcacaaga 1033  
 Y E V P S T P L C S A R E L A E K K Y I 365  
 cctacgaagtcccagcaccctcctgctgagtgaggggaacttctgtagaaaaatata 1093  
 L S N T N S F C Y E N E V A L S N K E E 385  
 ttctatccaactaattcattttgctatgagaacgaggtggcccttcaaacaaagagg 1153  
 K E E G T G D S L G P G G T N T D T S S 405  
 agaaagaggaagggaccgggacagcctggccctggcgggacaaacacggacactagct 1213  
 D S D H S Q A T V P L E P R P L R R E S 425  
 cagactctgaccacagccagccagcttcccttagaacacggccctcaagacgagaat 1273  
 E I \* 427  
 ctgaaatatga 1284

**B**

M S V G R L N R Y S I V S T E E D G L R 20  
 atgagttggggcgtctcaaccgttacagcatcgtgtcgacggaggagatggtctcgcgc 60  
 L T T M H G G G M N G Y G N G K I H T R 40  
 ttgacgaccatgcaaggtggaggatgaatggatggcaacggcaagatccatactcgg 120  
 R K C R N R F V K K N G Q C N V Q F T N 60  
 cggaaatgtcgaaacgctttgttaagaaaaatggcaatgcaatgtcagttcaccac 180  
 M N E K S L R Y L A D I F T T C V D I R 80  
 atgaacgagaagtcctcgtcctacgtgacatattcaccactgtgtggacatccgc 240  
 W R Y M L L V F T L V F V I S W L A F G 100  
 tggcgtacatgctactgttttcaacgctagtctcgtgattcttggttagcgttcggg 300  
 L A F W V I A L L H G D L D N P A G D D 120  
 ttggcgttttgggtcattgcgcttcttcaacggtgattggacaaccggcagggagcagc 360  
 N F T P C V L Q V N G F I A A F L F S I 140  
 aactcaccgcatcgtgctacaagtgaaagcgttctcgtcagcgttctctgtttccatc 420  
 E T Q T T I G Y G F R C V T E E C P L A 160  
 gagacgcaaacaccatcggttacggtttccgctcgtgacggaagatgctcctcctcgt 480  
 V F L V V F Q S I V G S I I D C F M I G 180  
 gtgttctctgtggttctcagctccatcgtggcagcatcagactgcttcatgattggg 540  
 \* \* \*  
 A I M A K M A R P K K R A O T L L F S H 200  
 gcaatcagggcaaacggcagctcccaagaagcagcagactcactgttctctcat 600  
 N A I I A M R D G K L Y L M W R V G N L 220  
 aacggcatcattgcatcgcgagtggaactgacttgaatggcggcagctgaaacttg 660  
 \* \* \*  
 R K S H I V E A H V R A Q L I K P R V T 240  
 cgaaagaccacatcgttagggacatgtccgagcagctcatcaagccgagggttacg 720  
 T E G E Y I P L D Q L D I N V G F D K G 260  
 accgaagcagatataccccctcagcagctgacatcaactggttttcgacaaga 780  
 L D R I F L V S P I T I L H Q I D Q E S 280  
 ctgtatcgtcttctcgtctcaccatcaccatcctcagcatcaaatcgcaaacagagac 840  
 P L F G I S K Q D L E T A D F E I V V I 300  
 ccttggttggcatcagcaagcagcagcagcagcagcagcagcagcagcagcagcagc 900  
 \*  
 L E G M V E A T A M T A Q A R S S Y L A 320  
 ttggagggaatggtagggccacagcctgacgagcagcagcagcagcagcagcagcagc 960  
 S E I L W G H R F E P V L F E E K N Q Y 340  
 agcgaatcctctggggccatcgtatcgagccggtgtgttcgagaaaagaaccaatc 1020  
 K V D Y S H F H K T Y E V P S T P H C S 360  
 aaggttgactactcaactccacaagcgtacgaggtgctcaccacccgactgagct 1080  
 A K D M M E N K Y L V V P S A N T F C Y 380  
 gccaaagacatgtagaaaacaagtactggtggtgccagcagcaccctctctgctac 1140  
 E N E L A I L N H E E E D D V P E G I K 400  
 gagaatgagctggcaactcctgaaccagaaagagagcagcagcttccagaaggtataag 1200  
 P E R A M S L S P E R T P R H E F E R L 420  
 ccagagcagcaatgagcctcagcccagagagaaccctcagatgaattgaacgactg 1260  
 Q N P R C T E Q R S Y R R E S E I \* 437  
 gagaaccctcgtgacggagcaaaagctacaccgagggagctgagatgataACCTTT 1320  
 AGTACAACTTTTTGATACTCACATTTTGTGTGCATCTCCGAGATACCTGAGCTTCTA 1380  
 CAATGCAGAACATGCAAAGTCCAAACGGAGAGAGTGAGCGCGTGAATGAGCAAAAAA 1440  
 AAAAAAAAAA 1450

# C

M S V G K P H R Y N I V S S S E E D V Y 20  
atgagtgtgggcaagccccaccgctacaacatcgtgctatcgtcagaggaggcgtgtac 60

R H G N M P A L G N G F G N G K V Q T R 40  
cggcagcgcaacatgccccctcggcaatggctttggaatggcaagtcagacacgc 120

R K V R S R F V N K T G Q C N V S F A H 60  
cgaaaggtcgggagccgctttgtaataaaaacaggccagtgcaacgtcagtttcgctcat 180

M D Q Q S Q R Y L A D I F T T C V D I R 80  
atggaccagcaatctcagcgctacctcgtgacatctttaccacctgctggacattcgt 240

W R W M F V L F S L A F V L G W L A F G 100  
tggcgtggatgtttgctctctcccttgcatttgcctgggctgctcgtcatttgg 300

**M1**  
F A F W L I A L V H G D L D R P T K E D 120  
ttcgccttctggcttattgctgctgtccacggtagcttagaccgacccactaaaggagc 360

F A P C V M Q V N S F I A A F L F S V E 140  
ttcgtccatgtgctcaggtcaacagcttcatgctgctttttgtctcagttgag 420

T Q T T I G Y G F R C V T E E C P L A V 160  
acgcaaacacacatcgctcaggtatccgctgtgtaaccgagagtgctcccttagcggtg 480

**M2**  
F M V V F Q S I M G C I I D S F M I G A 180  
ttatggtgctctccagtcacatcagggctgcatcattgactctttcatgatcggtgcc 540

I M A K M A R P K K R A E T I L F S H N 200  
atcatggcacaatggcaagcactaagaacgggcagaaacgatactgtctcgcacaat 600

A V I A M R D G K L C L M W R V G N L R 220  
gctgtcatcgctatgctgagggaaactgtgtctcattgtggcggtcgggaaactgagg 660

K S H I V E A H V R A Q L I K P R I T E 240  
aaaagtacattgtagaggctcagtgcgggcgagcttattaagccccgaatcacagaa 720

E G E Y I P L D Q I D I N V G Y D Q G L 260  
gagggcgagtacataccaactcgatcagatcgacatcaatgtgggctacgaccaaggtctc 780

D R I F L V A P L T I L H V I N E E S P 280  
gaccgcatctctcgtgtgctccttactatcctccatgtgataaatgaggaggtcct 840

L Y G I S K Q D L E T S D F E I V V I L 300  
ctgtatggaattagcaagcaggttggaaacatctgattttgagattgtggtatactg 900

E G M V E A T A M T A Q V R S S Y L A S 320  
gaagggatggtcgagggcactgctgtagcggctcaggtgagcagctcctacctggccagc 960

E I L W G H R F E P V V F E E R S Q Y K 340  
gagatcttatggggccatcgctttgagcccgtggtttgaggaacgcagccagataaaa 1020

V D Y S H F H K T H E V P S T P R C S A 360  
gtggactattcacatcttataagaccacaggttcctcgcagccacggttgagtgcc 1080

K D M E E N K S L E S G A N F C Y E N E 380  
aaagacatggaggagaataatccttgaggtccggagccaactctgctatgagaacgag 1140

L A F I S R D E E E Q E E D T G E R G T 400  
ttagcctttattagtagagatgaggaggagcaagaagagacacgggtgagagggcact 1200

E L E T L S A N L N F D Q R S Y H K E S 420  
gagctagagacccttcagccaatctgaactcgtcagaggtcatatcacaagaatct 1260

E I \* 422  
gaaatatgaCCCTTTGAAGACTTTGCTTTATCGTAGACTCAGCCTATTCTTCTAGTGACG 1320

GTGTAAACAGTTAGCTACAGAGCAATGTAAGTGCCATATGAATCCTTGACCCACTGTCCT 1380

AGGCCATGCTGTAGTTGGGGCAGGTCAGGAAAAAGAAAGTGCTTTTTGTAGATGGATGT 1440

TGGAAATGCGAGGCCCTCCCTGTAGGAAAACCTGAGATCGATTACCTGTTTCATACTGT 1500

AGTTTGACGTATAGCTTTAAGTAGTATCATTATGCAATACTAAGCTAGCCTGGGTGCA 1560

TATTGACTAAATCTTTTGTAAAGAAAATTGCACAAAATAGGTTATTAACCACTAGCC 1620

TGTTTGCTGGATATAGAGCAGAATGATACACTCTTGTGTTGGTGTGATTTACAGCAA 1680

TAAAAGACTTTTATCTATGCCAAAAAAAAAAAAAAAAAAAAAAAAA 1723
