# Supplementary material for: A novel inwardly rectifying K+ channel, Kir2.5, is upregulated under chronic cold stress in fish cardiac myocytes
Source: Oxford University Press journal article supplement (doi:10.1242/jeb.016121), 2008-06-14
Supplement: jeb016121-sup-016121-figs2.pdf [file jeb016121-sup-016121-figs2.pdf]

A

ccKir2.1 MGSVTANRYSIVSSEEDGMKLATAAVANGFGNGKSKVHTRQOCRSRFVKKDGHNCVQFIN 60  
 omKir2.1a MGSVTRNRYISIVSSEEDGMKLATAAVANGFGNGKSKVHTRQOCRSRFVKKDGHNCVQFIN 58  
 hKir2.1 MGSVTRNRYISIVSSEEDGMKLATAVANGFGNGKSKVHTRQOCRSRFVKKDGHNCVQFIN 60  
 gpKir2.1 MGSVTRNRYISIVSSEEDGMKLATAVANGFGNGKSKVHTRQOCRSRFVKKDGHNCVQFIN 60  
 rKir2.1 MGSVTRNRYISIVSSEEDGMKLATAVANGFGNGKSKVHTRQOCRSRFVKKDGHNCVQFIN 60  
 mKir2.1 MGSVTRNRYISIVSSEEDGMKLATAVANGFGNGKSKVHTRQOCRSRFVKKDGHNCVQFIN 60

ccKir2.1 VSEKSGORYLADIFTTCVDIRWRWMLVFICLAFVLSWLFPGCVFVWLAIALPHGDLN--G 118  
 omKir2.1a VSEKSGORYLADIFTTCVDIRWRWMLVFICLAFVLSWLFPGCVFVWLAIALPHGDLN--DAQ 116  
 hKir2.1 VGEKGORYLADIFTTCVDIRWRWMLVFICLAFVLSWLFPGCVFVWLAIALPHGLDLDASKE 120  
 gpKir2.1 VGEKQORYLADIFTTCVDIRWRWMLVFICLAFVLSWLFPGCVFVWLAIALPHGLDLDASKE 120  
 rKir2.1 VGEKGORYLADIFTTCVDIRWRWMLVFICLAFVLSWLFPGCVFVWLAIALPHGLDLDASKE 120  
 mKir2.1 VGEKGORYLADIFTTCVDIRWRWMLVFICLAFVLSWLFPGCVFVWLAIALPHGLDLDASK 120

ccKir2.1 KCVSEVNSFTAAPLFSIETOTTIGYGRCVTDECPAVFVWFQSI VGCIDAFIIGAVM 178  
 omKir2.1a KCVSEVNSFTAAPLFSIETOTTIGYGRVYTDDECPAVFVWFQSI VGCIDAFIIGAVM 176  
 hKir2.1 ACVSEVNSFTAAPLFSIETOTTIGYGRCVTDECPAVFVWFQSI VGCIDAFIIGAVM 180  
 gpKir2.1 ACVSEVNSFTAAPLFSIETOTTIGYGRCVTDECPAVFVWFQSI VGCIDAFIIGAVM 180  
 rKir2.1 ACVSEVNSFTAAPLFSIETOTTIGYGRCVTDECPAVFVWFQSI VGCIDAFIIGAVM 180  
 mKir2.1 ACVSEVNSFTAAPLFSIETOTTIGYGRCVTDECPAVFVWFQSI VGCIDAFIIGAVM 180

ccKir2.1 AKMAKPKKRNETLVFSHNAVIA MRDVKLCMLWRVGNLRKSHLVEAHVRAQLLSRITSE 238  
 omKir2.1a AKMAKPKKRNETLVFSHNAVIA MRDVKLCMLWRVGNLRKSHLVEAHVRAQLLSRITSE 236  
 hKir2.1 AKMAKPKKRNETLVFSHNAVIA MRDVKLCMLWRVGNLRKSHLVEAHVRAQLLSRITSE 240  
 gpKir2.1 AKMAKPKKRNETLVFSHNAVIA MRDVKLCMLWRVGNLRKSHLVEAHVRAQLLSRITSE 240  
 rKir2.1 AKMAKPKKRNETLVFSHNAVIA MRDVKLCMLWRVGNLRKSHLVEAHVRAQLLSRITSE 240  
 mKir2.1 AKMAKPKKRNETLVFSHNAVIA MRDVKLCMLWRVGNLRKSHLVEAHVRAQLLSRITSE 240

ccKir2.1 EYIPLDQIDIDVGFDSGIDRIPLVSPITIVHEIDEDSPYLDSKQIDINADFEIVVILEG 298  
 omKir2.1a EYIPLDQIDIDVGFDSGIDRIPLVSPITIVHEIDEDSPYLDSKQIDINADFEIVVILEG 296  
 hKir2.1 EYIPLDQIDIDVGFDSGIDRIPLVSPITIVHEIDEDSPYLDSKQIDINADFEIVVILEG 300  
 gpKir2.1 EYIPLDQIDIDVGFDSGIDRIPLVSPITIVHEIDEDSPYLDSKQIDINADFEIVVILEG 300  
 rKir2.1 EYIPLDQIDIDVGFDSGIDRIPLVSPITIVHEIDEDSPYLDSKQIDINADFEIVVILEG 300  
 mKir2.1 EYIPLDQIDIDVGFDSGIDRIPLVSPITIVHEIDEDSPYLDSKQIDINADFEIVVILEG 300

ccKir2.1 MVEATAMTQCRSSYLANEILMGHRYEPLVFEKHYKVDYSRPHKTYEVNTPCLSARD 358  
 omKir2.1a MVEATAMTQCRSSYLANEILMGHRYEPLVFEKHYKVDYSRPHKTYEVNTPCLSARD 356  
 hKir2.1 MVEATAMTQCRSSYLANEILMGHRYEPLVFEKHYKVDYSRPHKTYEVNTPCLSARD 360  
 gpKir2.1 MVEATAMTQCRSSYLANEILMGHRYEPLVFEKHYKVDYSRPHKTYEVNTPCLSARD 360  
 rKir2.1 MVEATAMTQCRSSYLANEILMGHRYEPLVFEKHYKVDYSRPHKTYEVNTPCLSARD 360  
 mKir2.1 MVEATAMTQCRSSYLANEILMGHRYEPLVFEKHYKVDYSRPHKTYEVNTPCLSARD 360

ccKir2.1 LAEKKYILSNANSFCYENEVALTSKEEEDSENG--VPESTSTDPDIDLHNOQASVPLE 417  
 omKir2.1a LAEKKYILSSANSFCYENEVALTSKEEEDSENG--VPESTSTDPDIDLHNOQASVPLE 415  
 hKir2.1 LAEKKYILSNANSFCYENEVALTSKEEEDSENG--VPESTSTDPDIDLHNOQASVPLE 417  
 gpKir2.1 LAEKKYILSNANSFCYENEVALTSKEEEDSENG--VPESTSTDPDIDLHNOQASVPLE 417  
 rKir2.1 LAEKKYILSNANSFCYENEVALTSKEEEDSENG--VPESTSTDPDIDLHNOQASVPLE 417  
 mKir2.1 LAEKKYILSNANSFCYENEVALTSKEEEDSENG--VPESTSTDPDIDLHNOQASVPLE 418

ccKir2.1 PRPLRRESEI 427  
 omKir2.1a PRPLRRESEI 425  
 hKir2.1 PRPLRRESEI 427  
 gpKir2.1 PRPLRRESEI 427  
 rKir2.1 PRPLRRESEI 427  
 mKir2.1 PRPLRRESEI 428

B

ccKir2.2 -MSVGRNINRYSIVSSEEDGLRLTTHMGGKSKVHTRQOCRSRFVKKDGHNCVQFIN 56  
 omKir2.2a -MSVGRNINRYSIVSSEEDGLRLTTHMGGKSKVHTRQOCRSRFVKKDGHNCVQFIN 59  
 rKir2.2 MTAASRANPYSIVSSEEDGLHLVMTSGA-----NGFGNGKVHTRRRCRMRFVKKNQCNI 55  
 mKir2.2 MTAASRANPYSIVSSEEDGLHLVMTSGA-----NGFGNGKVHTRRRCRMRFVKKNQCNI 55  
 gpKir2.2 MTAASRANPYSIVSSEEDGLHLVMTSGA-----NGFGNGKVHTRRRCRMRFVKKNQCNI 55  
 hKir2.2 MTAASRANPYSIVSSEEDGLHLVMTSGA-----NGFGNGKVHTRRRCRMRFVKKNQCNI 55

ccKir2.2 QFINNNEKSRYLADIFTTCVDIRWRYMLVFTVVFVLSWLAFAFVWVIALPHGDLN 116  
 omKir2.2a QFANMDEKRSRYLADMFTTCVDIRWRYMLVFTVVFVLSWLAFAFVWVIALPHGDLN 119  
 rKir2.2 EFANMDEKSORYLADMFTTCVDIRWRYMLVFTVVFVLSWLAFAFVWVIAHAGDLE-P 114  
 mKir2.2 EFANMDEKSORYLADMFTTCVDIRWRYMLVFTVVFVLSWLAFAFVWVIAHAGDLE-P 114  
 gpKir2.2 EFANMDEKSORYLADMFTTCVDIRWRYMLVFTVVFVLSWLAFAFVWVIAHAGDLE-P 114  
 hKir2.2 EFANMDEKSORYLADMFTTCVDIRWRYMLVFTVVFVLSWLAFAFVWVIAHAGDLE-P 114

ccKir2.2 AGDDNFTPCVLQVNSFTAAPLFSIETOTTIGYGRCVTEECPAVFVWFQSI VGCIDC 176  
 omKir2.2a AGDDNFTPCVLQVNSFTAAPLFSIETOTTIGYGRCVTEECPAVFVWFQSI VGCIDC 179  
 rKir2.2 AEGRRGTPCVLQVHGFMAAFPLFSIETOTTIGYGLRCVTEECPAVFVWFQSI VGCIDS 174  
 mKir2.2 AEGRRGTPCVLQVHGFMAAFPLFSIETOTTIGYGLRCVTEECPAVFVWFQSI VGCIDS 174  
 gpKir2.2 AEGRRGTPCVLQVHGFMAAFPLFSIETOTTIGYGLRCVTEECPAVFVWFQSI VGCIDS 174  
 hKir2.2 AEGRRGTPCVLQVHGFMAAFPLFSIETOTTIGYGLRCVTEECPAVFVWFQSI VGCIDS 174

ccKir2.2 FMIGAIMAKMARPKRAQTLLFSHNAVIALRDGKLCMLWRVGNLRKSHIVEAHVRAQLIK 236  
 omKir2.2a FMIGAIMAKMARPKRAQTLLFSHNAVIALSRDKSCLCLMWRVGNLRKSHIVEAHVRAQLIK 239  
 rKir2.2 FMIGAIMAKMARPKRAQTLLFSHNAVIALRDGKLCMLWRVGNLRKSHIVEAHVRAQLIK 234  
 mKir2.2 FMIGAIMAKMARPKRAQTLLFSHNAVIALRDGKLCMLWRVGNLRKSHIVEAHVRAQLIK 234  
 gpKir2.2 FMIGAIMAKMARPKRAQTLLFSHNAVIALRDGKLCMLWRVGNLRKSHIVEAHVRAQLIK 234  
 hKir2.2 FMIGAIMAKMARPKRAQTLLFSHNAVIALRDGKLCMLWRVGNLRKSHIVEAHVRAQLIK 234

ccKir2.2 PRVTEEGEYIPLDQIDIDVGFDPKGLDRIPLVSPITIVHEIDEDSPFLGISRDLETAADF 296  
 omKir2.2a PRVTEEGEYIPLDQIDIDVGFDPKGLDRIPLVSPITIVHEIDEDSPFLGISRDLETAADF 299  
 rKir2.2 PRVTEEGEYIPLDQIDIDVGFDPKGLDRIPLVSPITIVHEIDEDSPFLGISRDLETDFFE 294  
 mKir2.2 PRVTEEGEYIPLDQIDIDVGFDPKGLDRIPLVSPITIVHEIDEDSPFLGISRDLETDFFE 294  
 gpKir2.2 PRVTEEGEYIPLDQIDIDVGFDPKGLDRIPLVSPITIVHEIDEDSPFLGISRDLETDFFE 294  
 hKir2.2 PRVTEEGEYIPLDQIDIDVGFDPKGLDRIPLVSPITIVHEIDEDSPFLGISRDLETDFFE 294

ccKir2.2 IVVILEGMVEATAMTQARRSSYLANEILMGHRYEPLVFEKNOYKIDYSHFHKTYEVPST 356  
 omKir2.2a IVVILEGMVEATAMTQARRSSYLANEILMGHRYEPLVFEKNOYKIDYSHFHKTYEVPST 359  
 rKir2.2 IVVILEGMVEATAMTQARRSSYLANEILMGHRYEPLVFEKNOYKIDYSHFHKTYEVPST 354  
 mKir2.2 IVVILEGMVEATAMTQARRSSYLANEILMGHRYEPLVFEKNOYKIDYSHFHKTYEVPST 354  
 gpKir2.2 IVVILEGMVEATAMTQARRSSYLANEILMGHRYEPLVFEKNOYKIDYSHFHKTYEVPST 354  
 hKir2.2 IVVILEGMVEATAMTQARRSSYLANEILMGHRYEPLVFEKNOYKIDYSHFHKTYEVPST 354

ccKir2.2 PRCSAKDLMVENKFLVPSANFCYENLAFLSRDEDE-----VPEGKPE--RAMS--LSP 409  
 omKir2.2a PRCSAKDLMVENKFLVPSANSFCYENLAFLSRDEDEDEE--E--VVMGMSGSFRALANLNSP 418  
 rKir2.2 PRCSAKDLVFNKFLVPSANSFCYENLAFLSRDEDE-----VADL-----RDGRSP 401  
 mKir2.2 PRCSAKDLVFNKFLVPSANSFCYENLAFLSRDEDE-----VADL-----RDGRSP 401  
 gpKir2.2 PRCSAKDLVFNKFLVPSANSFCYENLAFLSRDEDE-----VPEGQDGRSRODGLSP 406  
 hKir2.2 PRCSAKDLVFNKFLVPSANSFCYENLAFLSRDEDE-----VADLQDGRSRODGLSP 406

ccKir2.2 ERTPRHFDFRLQNP-RCTEQRYSRRESEI 437  
 omKir2.2a DRNNRHDFRLQNT-RELDORYSRRESEI 446  
 rKir2.2 C--PRHDFDRLOA--SEALR-PYRRESEI 427  
 mKir2.2 C--PRHDFDRLOA--SEALR-PYRRESEI 427  
 gpKir2.2 C--PRHDFDRLOA--SEALR-PYRRESEI 433  
 hKir2.2 C--PRHDFDRLOA--SEALR-PYRRESEI 433
